# Supplementary material for: Pygo2 functions as a prognostic factor for glioma due to its up-regulation of H3K4me3 and promotion of MLL1/MLL2 complex recruitment
Source: PubMed Central journal article supplement (PMC4763266; doi:10.1038/srep22066), 2016-02-23
Supplement: srep22066-s1.pdf [file srep22066-s1.pdf]

## **Supplementary information**

### **Pygo2 functions as a prognostic factor for glioma due to its up-regulation of H3K4me3 and promotion of MLL1/MLL2 complex recruitment**

Cefan Zhou<sup>1</sup>, Yi Zhang<sup>1</sup>, Jun Dai<sup>1</sup>, Mengzhou Zhou<sup>1</sup>, Miao Liu<sup>2</sup>, Yefu Wang<sup>3</sup>, Xing-Zhen Chen<sup>1,4</sup>, Jingfeng Tang<sup>1\*</sup>

<sup>1</sup>Membrane Protein Disease and Cancer Research Center, Provincial Cooperative Innovation Center of Industrial Fermentation, College of Bioengineering, Hubei University of Technology, Wuhan, Hubei, 430068, China; <sup>2</sup>Neurology department, Renmin Hospital of Wuhan University, Wuhan, Hubei, 430060, China ; <sup>3</sup>The State Key Laboratory of Virology, College of Life Sciences, Wuhan University, Wuhan, Hubei, 430072, China; <sup>4</sup>Membrane Protein Disease Research Group, Department of Physiology, Faculty of Medicine and Dentistry, University of Alberta, Edmonton, AB, Canada.

\*To whom correspondence may be addressed: Membrane Protein Disease and Cancer Research Center, College of Bioengineering, Hubei University of Technology, Wuhan 430068, China.

\*Corresponding authors: Jingfeng Tang

E-Mail: Jingfeng\_HUT@163.com

Tel.: +86-27-5972-6585; Fax: +86-27-5922-0119.

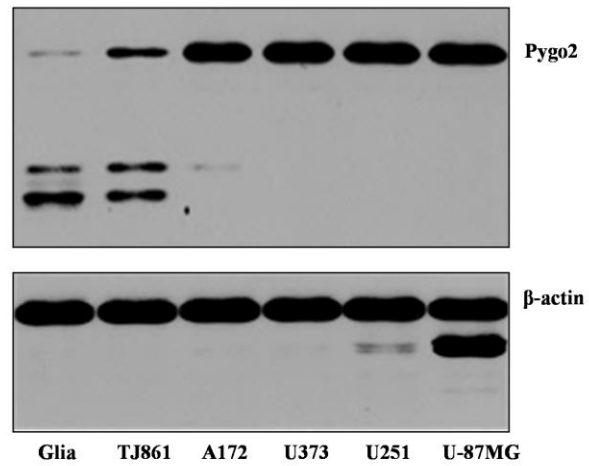

**Supplementary Figure 1.** Pygo2 protein expression in 5 glioma cell lines, TJ861, A172, U373, U251 and U-87MG, and normal human microglia cells (Gli, control). These are full-length blots corresponding to Fig. 1F in the main manuscript.
